# Supplementary material for: Emission trends of air pollutants and CO 2 in China from 2005 to 2021
Source: Copernicus journal article supplement (doi:10.5194/essd-15-2279-2023), 2023-06-06
Supplement: Supplementary file 1 [file essd-15-2279-2023-supplement.zip]

**Table caption list**

Table S1. Emission-source framework of ABaCAS-EI v2.0 dataset.

Table S2. Major data sources of activity data of different emission sources.

5 Table S3. References of emission factors for calculating air pollutant emissions.

Table S4. Comparison of considered emission sources of CO<sub>2</sub> between this study and other public datasets.

**Figure caption list**

Figure S1: Comparison of China’s emission inventories compiled in this study and in other studies.

Figure S2: Major Sectoral contributions on air pollutants and CO<sub>2</sub> emissions in 2005, 2013 and 2021 in China.

10 Figure S3: Spatial distribution of grid (27 km×27 km) air pollutants and CO<sub>2</sub> emissions in 2021 in China.

**Table S2. Major data sources of activity data of different emission sources.**

| Emission sources               | Activity data             | Major data sources <sup>a</sup>                                                                                                                                                                                                                                                                                                                                                                                                                                                                                                                                                                                                                                                                                                                                                                           |
|--------------------------------|---------------------------|-----------------------------------------------------------------------------------------------------------------------------------------------------------------------------------------------------------------------------------------------------------------------------------------------------------------------------------------------------------------------------------------------------------------------------------------------------------------------------------------------------------------------------------------------------------------------------------------------------------------------------------------------------------------------------------------------------------------------------------------------------------------------------------------------------------|
| Power plant                    | Fuel consumption          | China Energy Statistical Yearbook, section 6: Regional Energy Balance Sheets<br>Compendium of statistical data on the electric power industry, Table 2-2: Electricity generation by region                                                                                                                                                                                                                                                                                                                                                                                                                                                                                                                                                                                                                |
| Industrial boiler              | Fuel consumption          | China Energy Statistical Yearbook, section 6: Regional Energy Balance Sheets<br>China's Environmental Statistics (not publicly released)<br>Industrial investigation (not publicly released)                                                                                                                                                                                                                                                                                                                                                                                                                                                                                                                                                                                                              |
| Residential combustion         | Fuel consumption          | China Energy Statistical Yearbook, section 6: Regional Energy Balance Sheets<br>China Statistical Yearbook, Table 14-23: Building areas                                                                                                                                                                                                                                                                                                                                                                                                                                                                                                                                                                                                                                                                   |
| Transport                      | Vehicle population        | China Statistical Yearbook, Table 16-20: Civil vehicle population<br>China Transportation Statistical Yearbook, Table: Public transport population                                                                                                                                                                                                                                                                                                                                                                                                                                                                                                                                                                                                                                                        |
|                                | Fuel consumption          | China Energy Statistical Yearbook, section 6: Regional Energy Balance Sheets<br>International Energy Agency dataset: <a href="https://www.iea.org/">https://www.iea.org/</a> (last access: 25 April 2023)                                                                                                                                                                                                                                                                                                                                                                                                                                                                                                                                                                                                 |
| Open burning                   | Biomass consumption       | China Statistical Yearbook, Table 12-10: Major agricultural products production<br>Satellite observation product of MODIS burned area: MCD64A1, <a href="http://modis-fire.umd.edu/">http://modis-fire.umd.edu/</a> (last access: 25 April 2023)                                                                                                                                                                                                                                                                                                                                                                                                                                                                                                                                                          |
| Industrial process             | Industrial product output | China Statistical Yearbook, Table 13-13: Industrial products output by region<br>China Industrial Statistics Yearbook, Table 3-55: Industrial products output by region<br>China Iron and Steel Industry Yearbook, Table 7: Artificial block ore output<br>China Nonferrous Metal Yearbook, Table: Non-ferrous metal output by region<br>China Building Materials Industry Yearbook, Table: Major building materials products output<br>China Chemical Industry Yearbook, Table 8: Major products output<br>China's Environmental Statistics (not publicly released)<br>Industrial investigation (not publicly released)<br>China Light Industry Yearbook, Table 2: Major products output<br>China Paint Industry Yearbook, section 3: Architectural coatings market review and development trend outlook |
| Solvent                        | Solvent consumption       | China Coating Industry Association dataset:<br><a href="https://www.chinacoatingnet.com/index2.php">https://www.chinacoatingnet.com/index2.php</a> (last access: 25 April 2023)<br>China adhesives and tape industry association dataset: <a href="https://www.catia-china.com/">https://www.catia-china.com/</a> (last access: 25 April 2023)                                                                                                                                                                                                                                                                                                                                                                                                                                                            |
| Oil storage and transportation | Oil production and sales  | China Energy Statistical Yearbook, Table 3-5: Gasoline production by region; Table 3-6: Diesel production by region                                                                                                                                                                                                                                                                                                                                                                                                                                                                                                                                                                                                                                                                                       |
| Waste treatment                | Waste disposal volume     | China Environmental Statistical Yearbook, Table 10-6: Municipal wastewater discharge and treatment by region, Table 10-7: Urban appearance and environmental health by region                                                                                                                                                                                                                                                                                                                                                                                                                                                                                                                                                                                                                             |
|                                | Livestock stocking        | Chinese Animal Husbandry and Veterinary Yearbook, Table: Annual slaughter of major livestock by region, Table: Annual stock of major livestock by region                                                                                                                                                                                                                                                                                                                                                                                                                                                                                                                                                                                                                                                  |
| Agriculture                    | Fertilizer application    | China Rural Statistical Yearbook, Table 3-6: Chemical fertilizer application amount by region<br>Compendium of cost and income data of national agricultural products, Table: Fertilizer input by crop                                                                                                                                                                                                                                                                                                                                                                                                                                                                                                                                                                                                    |

a: All data collected from national yearbooks can be retrieved from the official website of National Bureau of Statistics: <https://data.stats.gov.cn/english/>, last access: 25 April 2023.

**Table S3. References of emission factors for calculating air pollutant emissions.**

| Emission sources                       | References                                              |
|----------------------------------------|---------------------------------------------------------|
| Powerplant and industrial sectors      | Zhao (2008); Zheng et al. (2019)                        |
| Residential combustion                 | Li et al. (2009); Wang et al. (2009); Cai et al. (2018) |
| On-road vehicle                        | (Zhang, 2014; Wen et al., 2021)                         |
| Open burning                           | Li et al. (2007); Qiu et al. (2016)                     |
| Solvent and other VOCs-related sectors | Wei et al. (2008); Chang et al. (2022)                  |
| NH <sub>3</sub> emission sectors       | Dong et al. (2010)                                      |
| Other sectors                          | Tian (2003); Lei (2008); Zhang (2008); Fu et al. (2013) |

20 **Table S4. Comparison of considered emission sources of CO<sub>2</sub> between this study and other public datasets.**

| Source    | Subsector                  | This study <sup>a</sup> | MEIC <sup>b</sup> | CHRED | CEDS <sup>c</sup> | EDGAR <sup>d</sup> | IEA |
|-----------|----------------------------|-------------------------|-------------------|-------|-------------------|--------------------|-----|
| Power     | Power plant                | √                       | √                 | √     | √                 | √                  | √   |
| Industry  |                            |                         | √                 |       |                   |                    |     |
|           | Industrial boiler          | √                       |                   | √     | √                 | √                  | √   |
|           | Iron and steel smelting    | √                       |                   | √     | √                 | √                  | √   |
|           | Cement production          | √                       |                   | √     | √                 | √                  | √   |
|           | Coke production            | √                       |                   |       | √                 | √                  | √   |
|           | Non-ferrous metal smelting | √                       |                   |       | √                 |                    | √   |
|           | Plate glass production     | √                       |                   |       | √                 | √                  | √   |
|           | Brick production           | √                       |                   |       |                   |                    |     |
|           | Lime production            | √                       |                   |       | √                 | √                  | √   |
|           | Ceramic production         | √                       |                   |       | √                 |                    | √   |
|           | Crude oil processing       | √                       |                   |       | √                 |                    | √   |
|           | Ethylene production        | √                       |                   |       | √                 |                    | √   |
|           | Ammonia production         | √                       |                   |       | √                 |                    | √   |
|           | Caustic soda production    | √                       |                   |       |                   |                    |     |
|           | Soda production            | √                       |                   |       |                   |                    |     |
|           | Calcium carbide production | √                       |                   |       |                   |                    |     |
|           | Carbon black production    | √                       |                   |       |                   |                    |     |
| Resident  |                            |                         | √                 |       |                   |                    |     |
|           | Residential combustion     | √                       |                   |       | √                 | √                  | √   |
|           | Solid waste incineration   | √                       |                   |       | √                 | √                  | √   |
| Transport |                            |                         | √                 |       |                   |                    |     |
|           | On-road vehicle            | √                       |                   | √     | √                 | √                  | √   |
|           | Agricultural machinery     | √                       |                   | √     | √                 | √                  | √   |
|           | Construction machinery     | √                       |                   |       | √                 | √                  | √   |
|           | Railway                    | √                       |                   | √     | √                 | √                  | √   |
|           | Inland waterway            | √                       |                   | √     | √                 | √                  | √   |
|           | International shipping     |                         |                   | √     | √                 | √                  | √   |
|           | Aviation                   |                         |                   | √     | √                 | √                  | √   |

a: CO<sub>2</sub> emissions in our studies have considered both those from the energy consumption processes such as fuel combustion in power plant, and those from the non-energy consumption processes such as carbonate decomposition during building material production.

b: CO<sub>2</sub> emissions from four broad sources are shared in the public MEIC dataset, without detailed subsector information.

25 c: CO<sub>2</sub> emissions of CEDS dataset are basically related to the energy consumption processes calculated based on the IEA energy statistics.

d: CO<sub>2</sub> emissions of EDGAR dataset also include those from the energy consumption processes calculated based on the IEA energy statistics, and some emissions from part of non-energy processes, such as the lime and glass production processes.

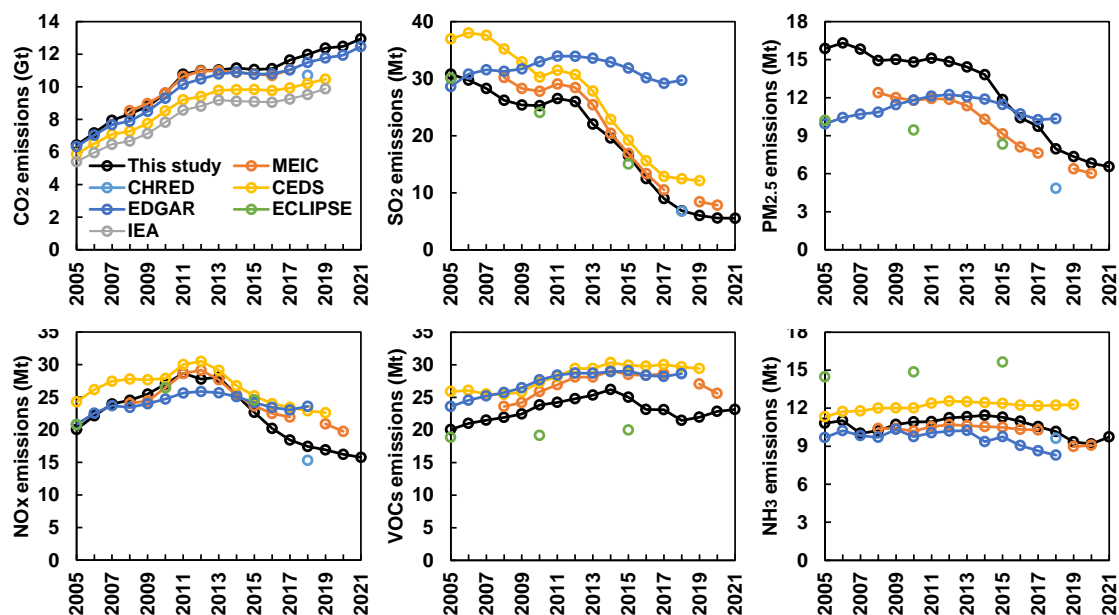

Figure S1: Comparison of China's emission inventories compiled in this study and in other studies.

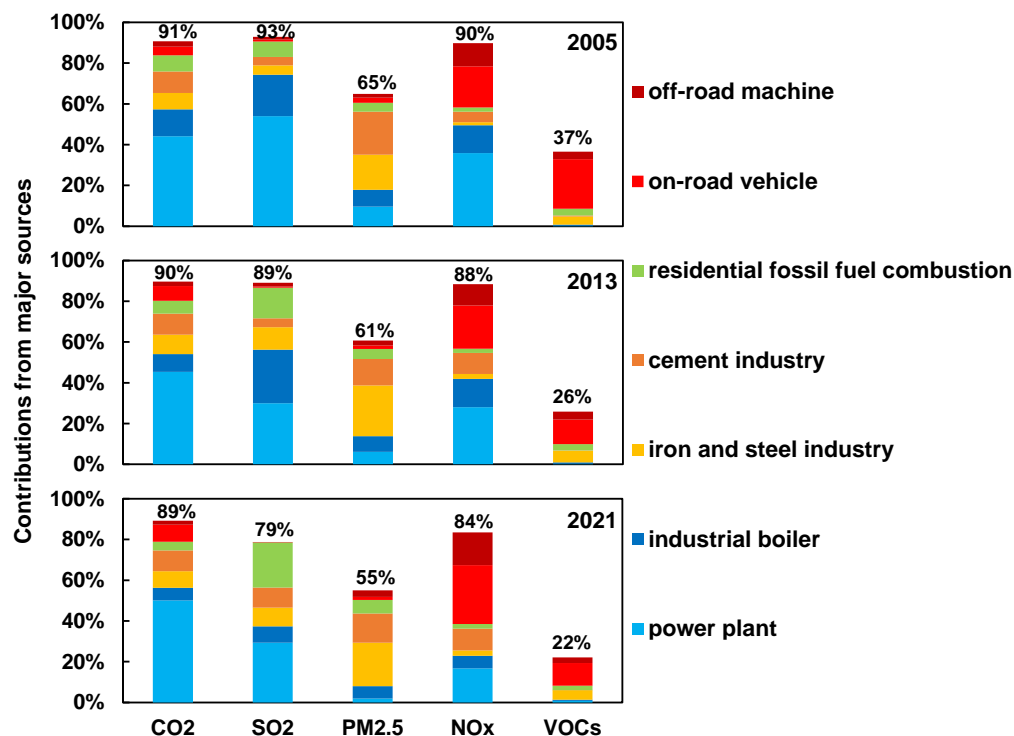

Figure S2: Major Sectoral contributions on air pollutants and CO<sub>2</sub> emissions in 2005, 2013 and 2021 in China.

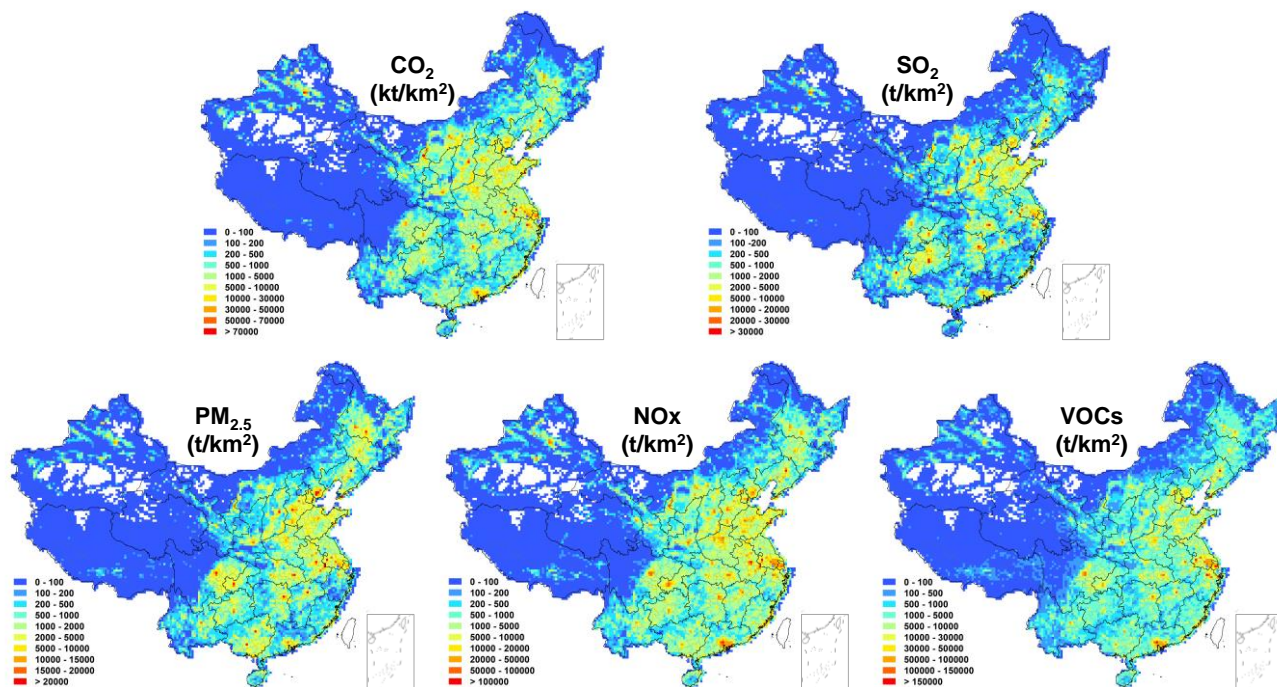

Figure S3: Spatial distribution of grid (27 km $\times$ 27 km) air pollutants and  $\text{CO}_2$  emissions in 2021 in China.

## References

- Cai, S., Li, Q., Wang, S., Chen, J., Ding, D., Zhao, B., Yang, D., and Hao, J.: Pollutant emissions from residential combustion and reduction strategies estimated via a village-based emission inventory in Beijing, *Environ. Pollut.*, 238, 230-237, <https://doi.org/10.1016/j.envpol.2018.03.036>, 2018.
- Chang, X., Zhao, B., Zheng, H., Wang, S., Cai, S., Guo, F., Gui, P., Huang, G., Wu, D., Han, L., Xing, J., Man, H., Hu, R., Liang, C., Xu, Q., Qiu, X., Ding, D., Liu, K., Han, R., Robinson, A. L., and Donahue, N. M.: Full-volatility emission framework corrects missing and underestimated secondary organic aerosol sources, *One Earth*, 5, 403-412, <https://doi.org/10.1016/j.oneear.2022.03.015>, 2022.
- Dong, W., Xing, J., and Wang, S.: Temporal and spatial distribution of anthropogenic ammonia emissions in China: 1994-2006, *Environ. Sci.*, 31, 1457-1463, <https://doi.org/10.13227/j.hjlx.2010.07.008>, 2010.
- Fu, X., Wang, S., Zhao, B., Xing, J., Cheng, Z., Liu, H., and Hao, J.: Emission inventory of primary pollutants and chemical speciation in 2010 for the Yangtze River Delta region, China, *Atmos. Environ.*, 70, 39-50, <https://doi.org/10.1016/j.atmosenv.2012.12.034>, 2013.
- Lei, Y.: Research on anthropogenic emissions and control of primary particles and its key chemical components, Ph.D. thesis, School of Environment, Tsinghua University, Beijing, 2008.
- Li, X., Wang, S., Duan, L., Hao, J., and Nie, Y.: Carbonaceous aerosol emissions from household biofuel combustion in China, *Environ. Sci. Technol.*, 43, 6076-6081, <https://doi.org/10.1021/es803330j>, 2009.
- Li, X., Wang, S., Duan, L., Hao, J., Li, C., Chen, Y., and Yang, L.: Particulate and trace gas emissions from open burning of wheat straw and corn stover in China, *Environ. Sci. Technol.*, 41, 6052-6058, <https://doi.org/10.1021/es0705137>, 2007.
- Qiu, X., Duan, L., Chai, F., Wang, S., Yu, Q., and Wang, S.: Deriving high-resolution emission inventory of open biomass burning in China based on satellite observations, *Environ. Sci. Technol.*, 50, 11779-11786, <https://doi.org/10.1021/acs.est.6b02705>, 2016.
- Tian, H.: Studies on present and future emissions of nitrogen oxides and its comprehensive control policies in China, Ph.D. thesis, School of Environment, Tsinghua University, Beijing, 2003.
- Wang, S., Wei, W., Du, L., Li, G., and Hao, J.: Characteristics of gaseous pollutants from biofuel-stoves in rural China, *Atmos. Environ.*, 43, 4148-4154, <https://doi.org/10.1016/j.atmosenv.2009.05.040>, 2009.
- Wei, W., Wang, S., Chatani, S., Klimont, Z., Cofala, J., and Hao, J.: Emission and speciation of non-methane volatile organic compounds from anthropogenic sources in China, *Atmos. Environ.*, 42, 4976-4988, <https://doi.org/10.1016/j.atmosenv.2008.02.044>, 2008.
- Wen, Y., Zhang, S., He, L., Yang, S., Wu, X., and Wu, Y.: Characterizing start emissions of gasoline vehicles and the seasonal, diurnal and spatial variabilities in China, *Atmos. Environ.*, 245, 10.1016/j.atmosenv.2020.118040, 2021.
- Zhang, C.: Studies on Present and Future Emissions of PM, SO<sub>2</sub>, NO<sub>x</sub>, MA.Eng thesis, School of Environment, Tsinghua University, Beijing, 2008.

- Zhang, S.: Characteristics and control strategies of vehicle emissions in typical cities of China, Ph.D. thesis, School of Environment, Tsinghua University, Beijing, 2014.
- Zhao, Y.: Study on air pollutant emission of coal-fired power plants in China and its environmental impacts, Ph.D. thesis, School of Environment, Tsinghua University, Beijing, 2008.
- 75 Zheng, H., Cai, S., Wang, S., Zhao, B., Chang, X., and Hao, J.: Development of a unit-based industrial emission inventory in the Beijing–Tianjin–Hebei region and resulting improvement in air quality modeling, *Atmos. Chem. Phys.*, 19, 3447–3462, <https://doi.org/10.5194/acp-19-3447-2019>, 2019.
