# Supplementary material for: Emission trends of air pollutants and CO 2 in China from 2005 to 2021
Source: Copernicus journal article supplement (doi:10.5194/essd-15-2279-2023), 2023-06-06
Supplement: Supplementary file 2 [file essd-15-2279-2023-supplement.zip]

Archive with 3 entries (3 files):
- essd-15-2279-2023-supplement-title-page.pdf
- Table S1.xlsx
- Supplement.pdf
