# Supplementary material for: Emission trends of air pollutants and CO 2 in China from 2005 to 2021
Source: Copernicus journal article supplement (doi:10.5194/essd-15-2279-2023), 2023-06-06
Supplement: Supplementary file 2 [file essd-15-2279-2023-supplement.zip › essd-15-2279-2023-supplement-title-page.pdf]

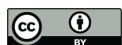

## *Supplement of*

# **Emission trends of air pollutants and CO<sub>2</sub> in China from 2005 to 2021**

**Shengyue Li et al.**

*Correspondence to:* Shuxiao Wang (shxwang@tsinghua.edu.cn)

- [essd-15-2279-2023-supplement-title-page.pdf](#)
- [Supplement.pdf](#)
- [Table S1.xlsx](#)

The copyright of individual parts of the supplement might differ from the article licence.
